# Supplementary material for: Development of Nanozyme-Labeled Biomimetic Immunoassay for Determination of Sulfadiazine Residue in Foods
Source: Hindawi journal article supplement (doi:10.1155/2020/7647580), 2020-05-12
Supplement: f1 [file 7647580.f1.docx]

**Development of Nanozyme-Labeled Biomimetic Immunoassay for Determination of Sulfadiazine Residue in Foods**

**Running head: BELISA Method with Nanozyme for SDZ**

Jingbo Hea, Li Zhanga, Longhua Xua, Feifan Kongb, Zhixiang Xua,*

aKey Laboratory of Food Processing Technology and Quality Control in Shandong Province, College of Food Science and Engineering, Shandong Agricultural University, Taian 271018, China

b Shandong Wuzhou Testing Co., Ltd., Sishui 273200, People’s Republic of China

*Corresponding author:

E-mail: zhixiangxu@sina.com (Zhixiang Xu)

Tel: +86 538 8242263

Fax: +86 538 8242482

Table S1 The effect of the ratio of the components used for synthesizing a MIP on its adsorption capacity

| SDZ (g) | MAA (g) | EGDMA (mL) | AIBN  (mg) | Molar ratio between SDZ, MAA, and EGDMA | *Q* (mg/g) |
| --- | --- | --- | --- | --- | --- |
| 0.25 | 0.18 | 1.51 | 20 | 1:2:8 | 3.21 |
| 0.25 | 0.26 | 1.51 | 20 | 1:3:8 | 5.13 |
| 0.25 | 0.26 | 3.02 | 20 | 1:3:16 | 10.32 |
| 0.25 | 0.26 | 3.77 | 20 | 1:3:20 | 31.25 |
| 0.25 | 0.35 | 3.02 | 20 | 1:4:16 | 20.04 |
| 0.25 | 0.35 | 3.77 | 20 | 1:4:20 | 41.09 |

FIGURE S1. Ultraviolet absorption spectrum of Au@Pt nanostructures.

FIGURE S2. FT-IR spectra of the imprinted film (a) before and (b) after extraction, and of the(c) non-imprinted film, and (d) sulfadiazine.


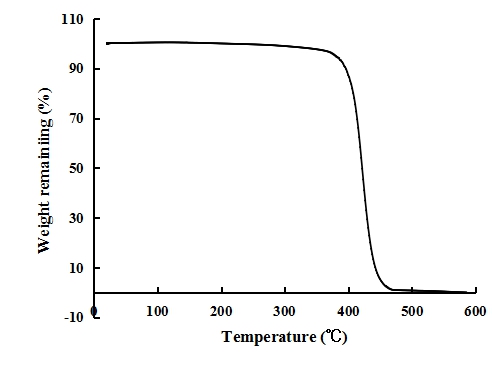


FIGURE S3. TGA curve of the MIP upon heating from 20 to 600 °C.


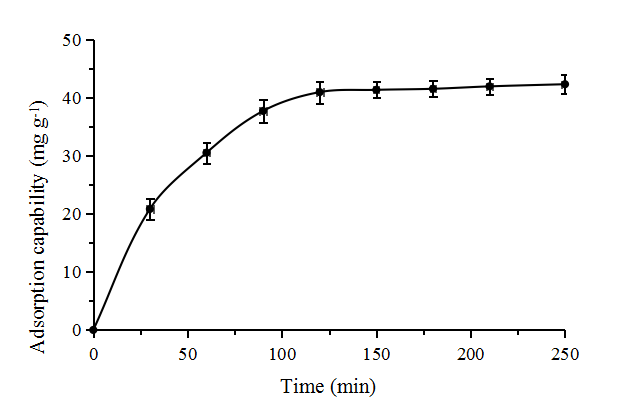


FIGURE S4 Kinetic uptake plot of the MIP


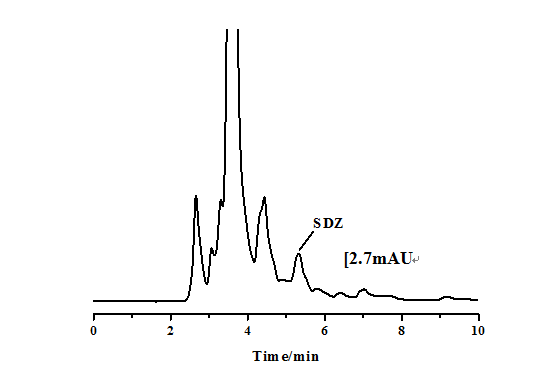


FIGURE S5. High performance liquid chromatograms for SDZ in the milk sample.
